# Supplementary material
Source: PubMed Central journal article supplement (PMC5551390)
Supplement: NIHMS889904-supplement-Supplemental.pdf [file NIHMS889904-supplement-Supplemental.pdf]

Supplemental online content for:

## Differential Radiographic Appearance of *BRAF* V600E–Mutant Metastatic Colorectal Cancer in Patients Matched by Primary Tumor Location

*Chloe E. Atreya, MD, PhD; Claire Greene, BA; Ryan M. McWhirter, BS; Nabia S. Ikram, MD; I. Elaine Allen, PhD; Katherine Van Loon, MD, MPH; Alan P. Venook, MD; Benjamin M. Yeh, MD; and Spencer C. Behr, MD*

J Natl Compr Canc Netw 2016;14(12):1536–1543

**eAppendix 1:** Supplemental Methods

**eAppendix 2:** Individual Patient Clinicopathologic Characteristics

**eAppendix 3:** Individual Patient Patterns of Metastatic Disease

**eAppendix 4:** Pattern of Metastasis by MSI Status

**eAppendix 5:** Patterns of Metastasis by *BRAF* Mutation Status and Location of Colorectal Cancer Primary With Omission of Transverse Colon Primaries

**eAppendix 6:** Univariate and Multivariate Predictors of Survival in *BRAF*-Mutant Metastatic Colorectal Cancer

**eAppendix 7:** Timing of Radiographic Detection of Ascites

## eAppendix 1. Supplemental Methods

### Patients

The primary pool for matching comprised of patients seen by 2 authors from March 1, 2014, to March 1, 2015. For reference, 152 patients with metastatic colorectal cancer were seen by these 2 authors over the course of 1 year: 60 (39%) were female, 55 (36%) were younger than 50 years at diagnosis, 48 (32%) had right-sided colon primaries, 59 (39%) had left-sided colon primaries, and 42 (28%) had rectal primaries; 58 (38%) tumors harbored a known RAS mutation and 12 (8%) harbored a known BRAF V600E mutation. If no match was identified, a third author's panel was searched, and the interval was later extended to September 2015. Extension beyond the original patient pool was necessary, in particular, to match females with right-sided colon primaries. A total of 224 patient records were searched. Follow-up was extended to August 2016, specifically to update the status of surviving patients and to review radiology reports and/or images for interval development of ascites.

### Image Analysis

For patients with only one CT study, liver metastases were considered present if greater than 1 cm. The cutoff point of 1 cm was chosen because subcentimeter lesions are too small to fully characterize on CT and have been found to be statistically benign even in patients with known malignancy.<sup>1</sup> For patients with multiple CTs, liver metastases were considered present if they were new or if 2 mm of growth had occurred for lesions less than 1 cm. Peritoneal or omental disease was considered present when soft tissue densities or nodular infiltration soft tissue were present that could not be attributed to a vessel, lymph nodes, or prior surgeries.

Unlike liver and other solid organs, the definition of peritoneal implants is not strictly defined in the radiology literature. Conversely, the overall sensitivity for detection of liver metastases is less than that of peritoneal implants. The overall sensitivity is 96% for peritoneal implants using multidetector-row CT<sup>2</sup> versus approximately 80% for liver metastases.<sup>3</sup>

### References

1. Khalil HI, Patterson SA, Panicek DM. Hepatic lesions deemed too small to characterize at CT: prevalence and importance in women with breast cancer. *Radiology* 2005;235:872–878.
2. Schmidt S, Meuli RA, Ahtari C, Prior JO. Peritoneal carcinomatosis in primary ovarian cancer staging: comparison between MDCT, MRI, and 18F-FDG PET/CT. *Clin Nucl Med* 2015;40:371–377.
3. Vialle R, Boucebci S, Richer JP, et al. Preoperative detection of hepatic metastases from colorectal cancer: prospective comparison of contrast-enhanced ultrasound and multidetector-row computed tomography (MDCT). *Diagn Interv Imaging* 2016;97:851–855.

eAppendix 2. Individual Patient Clinicopathologic Characteristics

| Study ID | BRAF<br>0=wild-type<br>1=mutant | Primary <sup>a</sup><br>1=R colon<br>2=L colon<br>3=rectum | Sex<br>1=male<br>2=female | Age<br>at diagnosis | RAS<br>0=wild-type<br>1=mutant | Expanded RAS <sup>b</sup><br>0=no; 1=yes<br>3=NA | MSI<br>0=MSS;<br>1=MSI<br>3=NA | Ethnicity<br>0=not Hispanic<br>1=Hispanic<br>3=unknown | Race<br>0=white<br>1=Asian <sup>c</sup><br>2=black<br>3=signet ring | Histology<br>0=adenoca<br>1=mucinous<br>3=signet ring | Stage<br>at diagnosis | Resected<br>Primary<br>0=no;<br>1=yes | Resected<br>Metastasis<br>0=no;<br>1=yes | Confirmed Dead<br>as of 07/2016<br>0=no;<br>1=yes | Survival<br>From mCRC<br>Diagnosis<br>(mo) | BRAF Trial<br>Participant<br>0=no;<br>1=yes | Notes                                           |
|----------|---------------------------------|------------------------------------------------------------|---------------------------|---------------------|--------------------------------|--------------------------------------------------|--------------------------------|--------------------------------------------------------|---------------------------------------------------------------------|-------------------------------------------------------|-----------------------|---------------------------------------|------------------------------------------|---------------------------------------------------|--------------------------------------------|---------------------------------------------|-------------------------------------------------|
| 1        | 1                               | 1                                                          | 1                         | 58                  | 0                              | 3                                                | 0                              | 0                                                      | 0                                                                   | 0                                                     | 3                     | 1                                     | 1                                        | 1                                                 | 27.4                                       | 1                                           |                                                 |
| 2        | 1                               | 1                                                          | 1                         | 59                  | 0                              | 3                                                | 0                              | 0                                                      | 0                                                                   | 0                                                     | 4                     | 1                                     | 1                                        | 1                                                 | 27.4                                       | 1                                           |                                                 |
| 3        | 1                               | 1                                                          | 0                         | 72                  | 0                              | 3                                                | 1                              | 1                                                      | 0                                                                   | 0                                                     | 5                     | 1                                     | 0                                        | 1                                                 | 6.5                                        | 1                                           |                                                 |
| 4        | 1                               | 2t                                                         | 0                         | 54                  | 0                              | 3                                                | 3                              | 0                                                      | 0                                                                   | 0                                                     | 3                     | 1                                     | 0                                        | 1                                                 | 4.6                                        | 1                                           |                                                 |
| 5        | 1                               | 3                                                          | 1                         | 57                  | 0                              | 3                                                | 3                              | 3                                                      | 1                                                                   | 0                                                     | 4                     | 0                                     | 0                                        | 1                                                 | 8.6                                        | 0                                           |                                                 |
| 6        | 1                               | 1                                                          | 1                         | 51                  | 0                              | 3                                                | 3                              | 0                                                      | 0                                                                   | 0                                                     | 4                     | 0                                     | 0                                        | 1                                                 | 29.6                                       | 0                                           |                                                 |
| 7        | 1                               | 3                                                          | 1                         | 77                  | 0                              | 3                                                | 1                              | 0                                                      | 0                                                                   | 0                                                     | 4                     | 1                                     | 0                                        | 0                                                 | 37.1                                       | 1                                           |                                                 |
| 8        | 1                               | 3                                                          | 1                         | 64                  | 0                              | 3                                                | 0                              | 0                                                      | 0                                                                   | 0                                                     | 3                     | 1                                     | 1                                        | 1                                                 | 31.0                                       | 1                                           |                                                 |
| 9        | 1                               | 2                                                          | 0                         | 59                  | 0                              | 3                                                | 0                              | 0                                                      | 0                                                                   | 0                                                     | 4                     | 0                                     | 0                                        | 1                                                 | 15.6                                       | 0                                           |                                                 |
| 10       | 1                               | 1                                                          | 1                         | 20                  | 0                              | 3                                                | 3                              | 0                                                      | 0                                                                   | 0                                                     | 3                     | 0                                     | 0                                        | 1                                                 | 40.5                                       | 1                                           |                                                 |
| 11       | 1                               | 1                                                          | 1                         | 62                  | 0                              | 3                                                | 3                              | 0                                                      | 0                                                                   | 0                                                     | 4                     | 1                                     | 0                                        | 1                                                 | 25.0                                       | 1                                           | Familial polyposis coli                         |
| 12       | 1                               | 1                                                          | 1                         | 64                  | 0                              | 3                                                | 3                              | 0                                                      | 0                                                                   | 1                                                     | 5                     | 1                                     | 0                                        | 1                                                 | 38                                         | 1                                           |                                                 |
| 13       | 1                               | 1                                                          | 1                         | 51                  | 0                              | 3                                                | 3                              | 0                                                      | 0                                                                   | 0                                                     | 3                     | 1                                     | 1                                        | 1                                                 | 74.0                                       | 1                                           |                                                 |
| 14       | 1                               | 1                                                          | 1                         | 58                  | 0                              | 3                                                | 3                              | 0                                                      | 0                                                                   | 0                                                     | 4                     | 1                                     | 0                                        | 1                                                 | 24.8                                       | 0                                           |                                                 |
| 15       | 1                               | 1                                                          | 1                         | 75                  | 0                              | 3                                                | 3                              | 3                                                      | 0                                                                   | 0                                                     | 3                     | 1                                     | 1                                        | 1                                                 | 25.7                                       | 0                                           |                                                 |
| 16       | 1                               | 2                                                          | 1                         | 45                  | 0                              | 3                                                | 0                              | 0                                                      | 0                                                                   | 0                                                     | 4                     | 1                                     | 0                                        | 1                                                 | 31.4                                       | 1                                           |                                                 |
| 17       | 1                               | 1                                                          | 0                         | 28                  | 0                              | 3                                                | 3                              | 0                                                      | 0                                                                   | 0                                                     | 4                     | 1                                     | 0                                        | 1                                                 | 34.7                                       | 1                                           |                                                 |
| 18       | 1                               | 1                                                          | 1                         | 57                  | 0                              | 3                                                | 3                              | 0                                                      | 0                                                                   | 0                                                     | 5                     | 1                                     | 0                                        | 1                                                 | 40.0                                       | 1                                           |                                                 |
| 19       | 1                               | 1                                                          | 0                         | 53                  | 0                              | 3                                                | 3                              | 0                                                      | 1                                                                   | 0                                                     | 2                     | 1                                     | 0                                        | 1                                                 | 24.5                                       | 1                                           |                                                 |
| 20       | 1                               | 1                                                          | 0                         | 27                  | 0                              | 3                                                | 3                              | 0                                                      | 0                                                                   | 0                                                     | 4                     | 1                                     | 0                                        | 1                                                 | 8.5                                        | 1                                           |                                                 |
| 21       | 1                               | 2t                                                         | 1                         | 66                  | 0                              | 3                                                | 3                              | 0                                                      | 0                                                                   | 0                                                     | 3                     | 1                                     | 0                                        | 1                                                 | 20.7                                       | 0                                           |                                                 |
| 22       | 1                               | 2                                                          | 1                         | 65                  | 0                              | 3                                                | 3                              | 0                                                      | 0                                                                   | 0                                                     | 2                     | 0                                     | 0                                        | 1                                                 | 14.9                                       | 0                                           |                                                 |
| 23       | 1                               | 2                                                          | 0                         | 62                  | 0                              | 3                                                | 0                              | 0                                                      | 0                                                                   | 0                                                     | 4                     | 0                                     | 0                                        | 1                                                 | 23.7                                       | 1                                           |                                                 |
| 24       | 1                               | 2t                                                         | 0                         | 61                  | 0                              | 3                                                | 3                              | 0                                                      | 1                                                                   | 0                                                     | 3                     | 1                                     | 0                                        | 1                                                 | 22.5                                       | 1                                           |                                                 |
| 25       | 1                               | 2                                                          | 0                         | 39                  | 0                              | 3                                                | 0                              | 0                                                      | 0                                                                   | 0                                                     | 4                     | 0                                     | 0                                        | 1                                                 | 18.3                                       | 0                                           |                                                 |
| 26       | 1                               | 1                                                          | 1                         | 57                  | 0                              | 3                                                | 3                              | 3                                                      | 0                                                                   | 1                                                     | 3                     | 1                                     | 0                                        | 1                                                 | 32.1                                       | 0                                           |                                                 |
| 27       | 1                               | 3                                                          | 1                         | 51                  | 0                              | 3                                                | 3                              | 0                                                      | 0                                                                   | 0                                                     | 4                     | 1                                     | 0                                        | 1                                                 | 20.1                                       | 0                                           |                                                 |
| 28       | 1                               | 1                                                          | 1                         | 70                  | 0                              | 3                                                | 3                              | 0                                                      | 0                                                                   | 0                                                     | 3                     | 1                                     | 0                                        | 1                                                 | 21.8                                       | 0                                           |                                                 |
| 29       | 1                               | 1                                                          | 0                         | 75                  | 0                              | 3                                                | 3                              | 0                                                      | 0                                                                   | 0                                                     | 3                     | 1                                     | 1                                        | 1                                                 | 16.5                                       | 0                                           |                                                 |
| 30       | 1                               | 1                                                          | 0                         | 65                  | 0                              | 3                                                | 3                              | 0                                                      | 1                                                                   | 0                                                     | 3                     | 1                                     | 1                                        | 0                                                 | 7.9                                        | 0                                           |                                                 |
| 31       | 1                               | 2                                                          | 0                         | 51                  | 0                              | 3                                                | 3                              | 0                                                      | 0                                                                   | 0                                                     | 3                     | 1                                     | 0                                        | 1                                                 | 12.9                                       | 0                                           |                                                 |
| 32       | 1                               | 2t                                                         | 1                         | 77                  | 0                              | 3                                                | 3                              | 0                                                      | 0                                                                   | 0                                                     | 4                     | 1                                     | 0                                        | 1                                                 | 33.7                                       | 0                                           |                                                 |
| 33       | 1                               | 1                                                          | 1                         | 45                  | 0                              | 3                                                | 0                              | 0                                                      | 0                                                                   | 0                                                     | 3                     | 1                                     | 0                                        | 0                                                 | 32.7                                       | 1                                           |                                                 |
| 34       | 1                               | 1t                                                         | 1                         | 48                  | 0                              | 3                                                | 0                              | 0                                                      | 0                                                                   | 1                                                     | 2                     | 0                                     | 0                                        | 0                                                 | 25.0                                       | 1                                           |                                                 |
| 35       | 1                               | 2                                                          | 0                         | 48                  | 0                              | 3                                                | 0                              | 0                                                      | 1                                                                   | 0                                                     | 5                     | 0                                     | 0                                        | 1                                                 | 9.4                                        | 0                                           |                                                 |
| 36       | 1                               | 1                                                          | 0                         | 60                  | 0                              | 3                                                | 0                              | 0                                                      | 0                                                                   | 0                                                     | 4                     | 0                                     | 0                                        | 0                                                 | 30.9                                       | 0                                           |                                                 |
| 37       | 1                               | 1                                                          | 1                         | 75                  | 0                              | 3                                                | 3                              | 0                                                      | 0                                                                   | 0                                                     | 4                     | 0                                     | 0                                        | 1                                                 | 10.2                                       | 1                                           |                                                 |
| 38       | 1                               | 1                                                          | 0                         | 66                  | 0                              | 3                                                | 1                              | 0                                                      | 0                                                                   | 2                                                     | 2                     | 0                                     | 0                                        | 1                                                 | 4.4                                        | 1                                           |                                                 |
| 39       | 1                               | 2t                                                         | 1                         | 27                  | 0                              | 3                                                | 0                              | 0                                                      | 0                                                                   | 1                                                     | 4                     | 0                                     | 0                                        | 0                                                 | 23.5                                       | 1                                           |                                                 |
| 40       | 1                               | 1                                                          | 1                         | 66                  | 0                              | 3                                                | 1                              | 0                                                      | 1                                                                   | 1                                                     | 2                     | 1                                     | 0                                        | 0                                                 | 7.7                                        | 0                                           | Lynch syndrome, immunotherapy trial participant |
| 41       | 0                               | 2                                                          | 0                         | 48                  | 0                              | 1                                                | 1                              | 0                                                      | 0                                                                   | 0                                                     | 3                     | 1                                     | 1                                        | 0                                                 | 29.5                                       | 0                                           | Lynch syndrome, immunotherapy trial participant |
| 42       | 0                               | 1                                                          | 0                         | 46                  | 0                              | 0                                                | 1                              | 0                                                      | 1                                                                   | 0                                                     | 5                     | 1                                     | 0                                        | 0                                                 | 41.8                                       | 0                                           |                                                 |
| 43       | 0                               | 1                                                          | 1                         | 65                  | 1                              | 3                                                | 0                              | 0                                                      | 0                                                                   | 2                                                     | 4                     | 1                                     | 1                                        | 1                                                 | 15.8                                       | 1                                           |                                                 |
| 44       | 0                               | 1                                                          | 1                         | 48                  | 0                              | 1                                                | 0                              | 0                                                      | 0                                                                   | 0                                                     | 3                     | 1                                     | 0                                        | 0                                                 | 32.0                                       | 0                                           |                                                 |
| 45       | 0                               | 1                                                          | 1                         | 45                  | 1                              | 3                                                | 0                              | 3                                                      | 0                                                                   | 0                                                     | 3                     | 0                                     | 0                                        | 1                                                 | 11.9                                       | 0                                           |                                                 |
| 46       | 0                               | 2                                                          | 0                         | 53                  | 1                              | 3                                                | 3                              | 0                                                      | 0                                                                   | 0                                                     | 2                     | 0                                     | 0                                        | 1                                                 | 15.7                                       | 0                                           |                                                 |
| 47       | 0                               | 2                                                          | 0                         | 85                  | 0                              | 0                                                | 0                              | 0                                                      | 0                                                                   | 0                                                     | 4                     | 1                                     | 0                                        | 1                                                 | 24.2                                       | 1                                           |                                                 |
| 48       | 0                               | 3                                                          | 1                         | 76                  | 0                              | 0                                                | 0                              | 0                                                      | 0                                                                   | 0                                                     | 4                     | 1                                     | 0                                        | 1                                                 | 17.3                                       | 1                                           |                                                 |
| 49       | 0                               | 1                                                          | 1                         | 88                  | 1                              | 3                                                | 0                              | 0                                                      | 0                                                                   | 0                                                     | 3                     | 1                                     | 1                                        | 0                                                 | 55.2                                       | 0                                           |                                                 |
| 50       | 0                               | 2                                                          | 1                         | 40                  | 0                              | 1                                                | 0                              | 0                                                      | 0                                                                   | 0                                                     | 3                     | 1                                     | 1                                        | 0                                                 | 19.9                                       | 0                                           |                                                 |
| 51       | 0                               | 1                                                          | 1                         | 53                  | 1                              | 3                                                | 0                              | 0                                                      | 2                                                                   | 1                                                     | 3                     | 1                                     | 0                                        | 1                                                 | 16.4                                       | 1                                           |                                                 |
| 52       | 0                               | 1                                                          | 1                         | 44                  | 1                              | 3                                                | 0                              | 0                                                      | 2                                                                   | 1                                                     | 4                     | 1                                     | 1                                        | 0                                                 | 24.0                                       | 0                                           |                                                 |
| 53       | 0                               | 2                                                          | 0                         | 67                  | 0                              | 0                                                | 0                              | 0                                                      | 0                                                                   | 0                                                     | 3                     | 2                                     | 1                                        | 0                                                 | 65.6                                       | 0                                           |                                                 |
| 54       | 0                               | 3                                                          | 0                         | 76                  | 0                              | 1                                                | 0                              | 0                                                      | 0                                                                   | 0                                                     | 5                     | 1                                     | 1                                        | 1                                                 | 54.8                                       | 1                                           |                                                 |
| 55       | 0                               | 1                                                          | 0                         | 66                  | 1                              | 3                                                | 0                              | 0                                                      | 0                                                                   | 0                                                     | 3                     | 1                                     | 1                                        | 0                                                 | 32.2                                       | 0                                           |                                                 |
| 56       | 0                               | 1                                                          | 0                         | 77                  | 1                              | 3                                                | 3                              | 1                                                      | 0                                                                   | 0                                                     | 3                     | 1                                     | 0                                        | 0                                                 | 29.4                                       | 1                                           |                                                 |
| 57       | 0                               | 2                                                          | 1                         | 57                  | 0                              | 1                                                | 0                              | 0                                                      | 1                                                                   | 0                                                     | 4                     | 1                                     | 0                                        | 0                                                 | 15.6                                       | 0                                           |                                                 |
| 58       | 0                               | 1                                                          | 0                         | 51                  | 1                              | 3                                                | 0                              | 0                                                      | 0                                                                   | 0                                                     | 5                     | 1                                     | 1                                        | 0                                                 | 18.9                                       | 1                                           |                                                 |
| 59       | 0                               | 1                                                          | 1                         | 55                  | 1                              | 3                                                | 0                              | 0                                                      | 2                                                                   | 0                                                     | 4                     | 1                                     | 0                                        | 1                                                 | 22.9                                       | 0                                           |                                                 |
| 60       | 0                               | 2                                                          | 1                         | 60                  | 0                              | 0                                                | 0                              | 0                                                      | 2                                                                   | 0                                                     | 5                     | 1                                     | 1                                        | 0                                                 | 38.3                                       | 0                                           |                                                 |

(continued on next page)

Abbreviations: mCRC, metastatic colorectal cancer; MSI, microsatellite instability; MSS, microsatellite stable; NA, not applicable.

a t=transverse colon.

b Mutation testing covered KRAS and NRAS codons 12, 13, 61, 117, and 146.

c Asian, Native Hawaiian, or Other Pacific Islander.

d 0=unknown; 1=low; 2=low/intermediate; 3=intermediate; 4=intermediate/high; 5=high.

Appendix 2. Individual Patient Clinicopathologic Characteristics (cont.)

| Study ID | BRAF        |          |          | Primary <sup>a</sup> | Sex | Age | RAS | Expanded RAS <sup>b</sup> | MSI | Ethnicity | Race | Histology | Stage at Diagnosis | Resected Primary |       | Resected Metastasis |       | Confirmed Dead | Survival From mCRC Diagnosis (mo) | BRAF Trial Participant | Notes |
|----------|-------------|----------|----------|----------------------|-----|-----|-----|---------------------------|-----|-----------|------|-----------|--------------------|------------------|-------|---------------------|-------|----------------|-----------------------------------|------------------------|-------|
|          | 0=wild-type | 1=mutant | 2=rectum |                      |     |     |     |                           |     |           |      |           |                    | 0=no             | 1=yes | 0=no                | 1=yes |                |                                   |                        |       |
| 61       | 0           | 1        | 1        | 1                    | 1   | 68  | 1   | 3                         | 3   | 0         | 1    | 1         | 4                  | 0                | 0     | 0                   | 1     | 16.1           |                                   |                        |       |
| 62       | 0           | 1        | 1        | 1                    | 1   | 28  | 1   | 3                         | 0   | 1         | 0    | 1         | 3                  | 1                | 1     | 1                   | 0     | 91.2           |                                   |                        |       |
| 63       | 0           | 1        | 0        | 0                    | 0   | 53  | 0   | 1                         | 0   | 0         | 0    | 0         | 2                  | 1                | 1     | 0                   | 0     | 42.2           |                                   |                        |       |
| 64       | 0           | 2        | 0        | 0                    | 0   | 52  | 0   | 1                         | 0   | 0         | 0    | 0         | 2                  | 1                | 0     | 0                   | 0     | 32.1           |                                   |                        |       |
| 65       | 0           | 3        | 1        | 0                    | 0   | 74  | 1   | 3                         | 3   | 0         | 0    | 0         | 4                  | 0                | 0     | 0                   | 0     | 28.6           |                                   |                        |       |
| 66       | 0           | 2        | 0        | 0                    | 0   | 50  | 0   | 1                         | 0   | 0         | 1    | 0         | 2                  | 1                | 1     | 1                   | 1     | 68.2           |                                   |                        |       |
| 67       | 0           | 1        | 0        | 0                    | 0   | 55  | 1   | 3                         | 0   | 0         | 0    | 0         | 4                  | 1                | 1     | 0                   | 0     | 67.4           |                                   |                        |       |
| 68       | 0           | 1        | 1        | 1                    | 1   | 54  | 1   | 3                         | 3   | 0         | 0    | 0         | 4                  | 1                | 1     | 1                   | 1     | 58.3           |                                   |                        |       |
| 69       | 0           | 2        | 1        | 1                    | 1   | 51  | 0   | 1                         | 1   | 3         | 0    | 0         | 3                  | 1                | 0     | 0                   | 1     | 50.9           |                                   |                        |       |
| 70       | 0           | 1        | 1        | 1                    | 1   | 42  | 1   | 3                         | 1   | 3         | 0    | 0         | 3                  | 1                | 0     | 0                   | 0     | 8.1            |                                   | Lynch syndrome         |       |
| 71       | 0           | 1        | 0        | 0                    | 0   | 47  | 1   | 3                         | 0   | 0         | 0    | 1         | 2                  | 1                | 0     | 0                   | 1     | 25.7           |                                   |                        |       |
| 72       | 0           | 1        | 0        | 0                    | 0   | 48  | 0   | 0                         | 1   | 0         | 0    | 0         | 3                  | 1                | 1     | 0                   | 0     | 62.7           |                                   |                        |       |
| 73       | 0           | 3        | 0        | 0                    | 0   | 65  | 1   | 3                         | 0   | 0         | 0    | 0         | 4                  | 1                | 1     | 0                   | 0     | 51.1           |                                   |                        |       |
| 74       | 0           | 3        | 1        | 1                    | 1   | 64  | 1   | 3                         | 0   | 0         | 1    | 0         | 3                  | 1                | 0     | 0                   | 0     | 23.7           |                                   |                        |       |
| 75       | 0           | 1t       | 1        | 0                    | 1   | 67  | 0   | 0                         | 3   | 3         | 0    | 0         | 5                  | 0                | 0     | 1                   | 1     | 9.4            |                                   |                        |       |
| 76       | 0           | 1        | 0        | 0                    | 0   | 67  | 1   | 3                         | 3   | 0         | 1    | 0         | 3                  | 1                | 0     | 0                   | 0     | 25.2           |                                   |                        |       |
| 77       | 0           | 1        | 1        | 1                    | 1   | 38  | 1   | 3                         | 0   | 0         | 1    | 0         | 3                  | 1                | 0     | 1                   | 1     | 44.9           |                                   |                        |       |
| 78       | 0           | 2        | 0        | 0                    | 0   | 53  | 1   | 3                         | 0   | 0         | 0    | 0         | 4                  | 1                | 1     | 0                   | 0     | 42.7           |                                   |                        |       |
| 79       | 0           | 1        | 0        | 0                    | 0   | 71  | 0   | 1                         | 0   | 0         | 0    | 0         | 4                  | 1                | 1     | 1                   | 1     | 22.9           |                                   |                        |       |
| 80       | 0           | 2        | 0        | 0                    | 0   | 34  | 0   | 0                         | 0   | 0         | 0    | 0         | 4                  | 1                | 1     | 0                   | 0     | 43.2           |                                   |                        |       |
| 81       | 0           | 2        | 0        | 0                    | 0   | 56  | 1   | 0                         | 0   | 0         | 0    | 0         | 1                  | 1                | 0     | 0                   | 1     | 31.1           |                                   |                        |       |
| 82       | 0           | 1        | 1        | 1                    | 1   | 50  | 1   | 3                         | 0   | 0         | 0    | 0         | 4                  | 0                | 0     | 0                   | 1     | 20.9           |                                   |                        |       |
| 83       | 0           | 1        | 1        | 1                    | 1   | 72  | 1   | 3                         | 0   | 0         | 0    | 0         | 4                  | 1                | 0     | 0                   | 0     | 37.2           |                                   |                        |       |
| 84       | 0           | 1        | 0        | 0                    | 0   | 53  | 1   | 3                         | 0   | 0         | 0    | 1         | 4                  | 1                | 0     | 0                   | 1     | 8.4            |                                   |                        |       |
| 85       | 0           | 1        | 1        | 1                    | 1   | 82  | 1   | 3                         | 0   | 1         | 0    | 0         | 3                  | 1                | 0     | 0                   | 1     | 10.9           |                                   |                        |       |
| 86       | 0           | 2        | 0        | 0                    | 0   | 74  | 1   | 3                         | 3   | 3         | 0    | 0         | 4                  | 1                | 0     | 0                   | 1     | 22.3           |                                   |                        |       |
| 87       | 0           | 1        | 1        | 1                    | 1   | 70  | 1   | 3                         | 3   | 0         | 0    | 0         | 4                  | 1                | 0     | 0                   | 1     | 17.9           |                                   |                        |       |
| 88       | 0           | 1        | 0        | 0                    | 0   | 42  | 1   | 3                         | 3   | 3         | 0    | 0         | 3                  | 1                | 1     | 1                   | 1     | 32.6           |                                   |                        |       |
| 89       | 0           | 1        | 1        | 1                    | 1   | 56  | 1   | 3                         | 3   | 0         | 0    | 0         | 3                  | 1                | 1     | 1                   | 1     | 45.0           |                                   |                        |       |
| 90       | 0           | 1        | 1        | 1                    | 1   | 67  | 1   | 3                         | 3   | 3         | 0    | 0         | 3                  | 1                | 0     | 0                   | 1     | 48.7           |                                   |                        |       |
| 91       | 0           | 1        | 1        | 1                    | 1   | 51  | 0   | 0                         | 0   | 3         | 0    | 0         | 4                  | 1                | 0     | 0                   | 1     | 17.4           |                                   |                        |       |
| 92       | 0           | 2        | 0        | 0                    | 0   | 73  | 0   | 1                         | 0   | 0         | 0    | 0         | 4                  | 1                | 1     | 0                   | 0     | 27.9           |                                   |                        |       |
| 93       | 0           | 1t       | 1        | 1                    | 1   | 67  | 1   | 3                         | 3   | 0         | 2    | 1         | 5                  | 1                | 0     | 0                   | 1     | 35.2           |                                   |                        |       |
| 94       | 0           | 1        | 1        | 1                    | 1   | 54  | 1   | 3                         | 0   | 0         | 0    | 1         | 3                  | 1                | 0     | 0                   | 0     | 15.3           |                                   |                        |       |
| 95       | 0           | 3        | 1        | 1                    | 1   | 64  | 1   | 3                         | 1   | 0         | 0    | 0         | 3                  | 1                | 1     | 1                   | 1     | 23.0           |                                   |                        |       |
| 96       | 0           | 2        | 0        | 0                    | 0   | 30  | 1   | 3                         | 0   | 0         | 0    | 0         | 5                  | 1                | 0     | 0                   | 1     | 12.8           |                                   |                        |       |
| 97       | 0           | 1        | 1        | 1                    | 1   | 44  | 1   | 3                         | 0   | 0         | 1    | 0         | 4                  | 1                | 1     | 0                   | 0     | 28.1           |                                   |                        |       |
| 98       | 0           | 2        | 0        | 0                    | 0   | 58  | 1   | 3                         | 3   | 0         | 0    | 0         | 2                  | 1                | 1     | 0                   | 0     | 38.1           |                                   |                        |       |
| 99       | 0           | 2        | 1        | 1                    | 1   | 38  | 0   | 1                         | 0   | 0         | 1    | 0         | 5                  | 1                | 0     | 0                   | 1     | 17.2           |                                   |                        |       |
| 100      | 0           | 3        | 1        | 1                    | 1   | 69  | 0   | 1                         | 0   | 0         | 0    | 0         | 3                  | 0                | 0     | 0                   | 0     | 19.4           |                                   |                        |       |
| 101      | 0           | 3        | 1        | 1                    | 1   | 56  | 0   | 0                         | 3   | 0         | 0    | 0         | 2                  | 1                | 0     | 0                   | 0     | 35.3           |                                   |                        |       |
| 102      | 0           | 1        | 1        | 1                    | 1   | 43  | 0   | 1                         | 0   | 0         | 0    | 0         | 3                  | 1                | 0     | 0                   | 0     | 23.1           |                                   |                        |       |
| 103      | 0           | 2        | 1        | 1                    | 1   | 71  | 0   | 0                         | 3   | 0         | 0    | 0         | 5                  | 1                | 0     | 0                   | 0     | 23.1           |                                   |                        |       |
| 104      | 0           | 2        | 0        | 0                    | 0   | 47  | 1   | 3                         | 0   | 0         | 1    | 0         | 4                  | 1                | 1     | 1                   | 0     | 17.8           |                                   |                        |       |
| 105      | 0           | 1        | 0        | 0                    | 0   | 105 | 1   | 3                         | 3   | 0         | 1    | 0         | 4                  | 1                | 0     | 0                   | 1     | 31.5           |                                   |                        |       |
| 106      | 0           | 1        | 1        | 1                    | 1   | 64  | 1   | 3                         | 3   | 3         | 0    | 0         | 4                  | 1                | 0     | 0                   | 1     | 23.1           |                                   |                        |       |
| 107      | 0           | 2        | 1        | 1                    | 1   | 47  | 1   | 3                         | 0   | 0         | 0    | 0         | 4                  | 0                | 0     | 0                   | 0     | 16.4           |                                   |                        |       |
| 108      | 0           | 1        | 1        | 1                    | 1   | 52  | 0   | 1                         | 3   | 0         | 0    | 0         | 4                  | 1                | 1     | 0                   | 0     | 22.0           |                                   |                        |       |
| 109      | 0           | 1        | 1        | 1                    | 1   | 53  | 0   | 1                         | 3   | 0         | 0    | 2         | 4                  | 1                | 1     | 1                   | 1     | 18.4           |                                   |                        |       |
| 110      | 0           | 2        | 1        | 1                    | 1   | 48  | 0   | 1                         | 0   | 0         | 1    | 0         | 3                  | 1                | 0     | 0                   | 0     | 29.5           |                                   |                        |       |
| 111      | 0           | 1        | 0        | 0                    | 0   | 70  | 1   | 3                         | 3   | 0         | 0    | 0         | 3                  | 1                | 0     | 0                   | 0     | 18.0           |                                   |                        |       |
| 112      | 0           | 2        | 1        | 1                    | 1   | 50  | 1   | 3                         | 0   | 0         | 0    | 0         | 2                  | 1                | 1     | 0                   | 0     | 12.1           |                                   |                        |       |
| 113      | 0           | 1        | 1        | 1                    | 1   | 65  | 1   | 3                         | 0   | 0         | 0    | 0         | 4                  | 0                | 0     | 0                   | 0     | 64.8           |                                   |                        |       |
| 114      | 0           | 1        | 0        | 0                    | 0   | 58  | 0   | 1                         | 0   | 0         | 0    | 2         | 4                  | 0                | 0     | 0                   | 0     | 8.8            |                                   |                        |       |
| 115      | 0           | 1        | 1        | 1                    | 1   | 72  | 1   | 3                         | 3   | 1         | 0    | 0         | 2                  | 0                | 0     | 0                   | 0     | 19.6           |                                   |                        |       |
| 116      | 0           | 1t       | 1        | 1                    | 1   | 51  | 0   | 1                         | 0   | 1         | 1    | 0         | 3                  | 1                | 1     | 0                   | 1     | 14.8           |                                   |                        |       |
| 117      | 0           | 2        | 1        | 1                    | 1   | 51  | 0   | 1                         | 0   | 0         | 1    | 1         | 3                  | 1                | 0     | 0                   | 0     | 64.5           |                                   |                        |       |
| 118      | 0           | 1        | 1        | 1                    | 1   | 68  | 1   | 3                         | 3   | 0         | 0    | 0         | 3                  | 0                | 0     | 0                   | 0     | 6.5            |                                   |                        |       |
| 119      | 0           | 1        | 1        | 1                    | 1   | 68  | 0   | 1                         | 3   | 1         | 0    | 0         | 4                  | 1                | 0     | 0                   | 1     | 50.8           |                                   |                        |       |
| 120      | 0           | 1        | 1        | 1                    | 1   | 75  | 1   | 3                         | 0   | 0         | 0    | 0         | 4                  | 1                | 0     | 0                   | 0     | 16.1           |                                   |                        |       |

Abbreviations: mCRC, metastatic colorectal cancer; MSI, microsatellite instability; MSS, microsatellite stable; NA, not applicable.  
a) t=transverse colon.  
b) Mutation testing covered KRAS and NRAS codons 12, 13, 61, 117, and 146.  
c) Asian, Native Hawaiian, or Other Pacific Islander.  
d) 0=unknown; 1=low; 2=low/intermediate; 3=intermediate; 4=intermediate/high; 5=high.

## eAppendix 3. Individual Patient Patterns of Metastatic Disease

| Study ID | BRF<br>0=wild-type<br>1=mutant | Liver<br>Metastases |                | Lung<br>Metastases | Bone<br>Metastases | Lymph<br>Node |                              | Peritoneal<br>Metastases | Other<br>Metastatic<br>Sites                   | Number of<br>Metastatic<br>Sites | RECIST 1.1 | Time to<br>Ascites<br>(mo) <sup>a</sup> |
|----------|--------------------------------|---------------------|----------------|--------------------|--------------------|---------------|------------------------------|--------------------------|------------------------------------------------|----------------------------------|------------|-----------------------------------------|
|          |                                | 0=no;<br>1=yes      | 0=no;<br>1=yes |                    |                    | Ascites       | Measurable<br>0=no;<br>1=yes |                          |                                                |                                  |            |                                         |
| 1        | 1                              | 0                   | 1              | 0                  | 0                  | 0             | 0                            | 0                        |                                                | 1                                | 0          |                                         |
| 2        | 1                              | 1                   | 1              | 1                  | 1                  | 0             | 0                            | 1                        | Soft tissue,<br>adrenal,<br>muscular,<br>renal | 8                                | 1          |                                         |
| 3        | 1                              | 0                   | 0              | 0                  | 0                  | 1             | 0                            | 0                        |                                                | 1                                | 1          |                                         |
| 4        | 1                              | 0                   | 0              | 0                  | 0                  | 1             | 1                            | 0                        |                                                | 2                                | 1          | 0.0                                     |
| 5        | 1                              | 1                   | 0              | 0                  | 0                  | 0             | 1                            | 0                        |                                                | 2                                | 1          | 8.6                                     |
| 6        | 1                              | 1                   | 1              | 1                  | 0                  | 1             | 0                            | 1                        |                                                | 4                                | 1          |                                         |
| 7        | 1                              | 0                   | 0              | 0                  | 0                  | 1             | 0                            | 0                        |                                                | 1                                | 1          |                                         |
| 8        | 1                              | 1                   | 0              | 0                  | 0                  | 0             | 1                            | 0                        | Soft tissue,<br>pancreas                       | 4                                | 1          | 29.5                                    |
| 9        | 1                              | 1                   | 0              | 0                  | 0                  | 0             | 1                            | 1                        |                                                | 3                                | 1          | 9.2                                     |
| 10       | 1                              | 1                   | 1              | 1                  | 1                  | 1             | 1                            | 1                        |                                                | 6                                | 1          | 30.4                                    |
| 11       | 1                              | 1                   | 0              | 0                  | 0                  | 0             | 1                            | 1                        | Pleura                                         | 4                                | 0          | 23.1                                    |
| 12       | 1                              | 0                   | 0              | 0                  | 0                  | 1             | 1                            | 0                        | Soft tissue                                    | 3                                | 1          | 0.0                                     |
| 13       | 1                              | 0                   | 1              | 0                  | 0                  | 0             | 0                            | 1                        |                                                | 2                                | 1          |                                         |
| 14       | 1                              | 1                   | 0              | 0                  | 0                  | 1             | 1                            | 1                        |                                                | 4                                | 1          | 24.0                                    |
| 15       | 1                              | 0                   | 0              | 0                  | 0                  | 0             | 1                            | 1                        |                                                | 2                                | 0          | 21.8                                    |
| 16       | 1                              | 0                   | 0              | 1                  | 1                  | 1             | 0                            | 0                        |                                                | 2                                | 1          |                                         |
| 17       | 1                              | 1                   | 0              | 0                  | 1                  | 0             | 1                            | 1                        |                                                | 3                                | 1          |                                         |
| 18       | 1                              | 0                   | 1              | 0                  | 1                  | 0             | 0                            | 0                        |                                                | 2                                | 1          |                                         |
| 19       | 1                              | 0                   | 0              | 1                  | 0                  | 0             | 1                            | 1                        |                                                | 3                                | 0          | 0.3                                     |
| 20       | 1                              | 1                   | 0              | 0                  | 1                  | 1             | 1                            | 1                        |                                                | 4                                | 1          | 4.6                                     |
| 21       | 1                              | 1                   | 1              | 0                  | 1                  | 1             | 1                            | 0                        |                                                | 4                                | 1          | 19.6                                    |
| 22       | 1                              | 1                   | 1              | 0                  | 1                  | 0             | 0                            | 0                        |                                                | 3                                | 1          |                                         |
| 23       | 1                              | 0                   | 0              | 0                  | 1                  | 1             | 1                            | 1                        |                                                | 3                                | 0          | 0.0                                     |
| 24       | 1                              | 1                   | 1              | 0                  | 0                  | 0             | 0                            | 0                        |                                                | 2                                | 1          |                                         |
| 25       | 1                              | 1                   | 0              | 0                  | 1                  | 1             | 1                            | 1                        |                                                | 4                                | 1          | 2.8                                     |
| 26       | 1                              | 1                   | 0              | 0                  | 1                  | 0             | 0                            | 0                        |                                                | 2                                | 1          |                                         |
| 27       | 1                              | 0                   | 1              | 0                  | 0                  | 0             | 0                            | 1                        |                                                | 2                                | 1          |                                         |
| 28       | 1                              | 1                   | 0              | 0                  | 1                  | 1             | 1                            | 0                        |                                                | 3                                | 1          | 21.4                                    |
| 29       | 1                              | 1                   | 0              | 0                  | 0                  | 0             | 0                            | 0                        |                                                | 1                                | 1          |                                         |
| 30       | 1                              | 0                   | 0              | 0                  | 0                  | 0             | 0                            | 0                        |                                                | 0                                | 0          |                                         |
| 31       | 1                              | 0                   | 1              | 0                  | 1                  | 0             | 0                            | 0                        |                                                | 2                                | 1          |                                         |
| 32       | 1                              | 0                   | 0              | 0                  | 0                  | 0             | 0                            | 1                        |                                                | 1                                | 1          |                                         |
| 33       | 1                              | 1                   | 1              | 0                  | 0                  | 0             | 0                            | 0                        | Brain                                          | 3                                | 1          |                                         |
| 34       | 1                              | 0                   | 0              | 0                  | 0                  | 0             | 1                            | 1                        |                                                | 2                                | 0          | 0.0                                     |
| 35       | 1                              | 0                   | 0              | 0                  | 1                  | 1             | 1                            | 0                        |                                                | 2                                | 1          | 0.0                                     |
| 36       | 1                              | 0                   | 0              | 0                  | 1                  | 0             | 1                            | 1                        |                                                | 2                                | 1          |                                         |
| 37       | 1                              | 1                   | 0              | 0                  | 0                  | 1             | 1                            | 1                        |                                                | 3                                | 1          | 7.0                                     |
| 38       | 1                              | 1                   | 0              | 0                  | 0                  | 1             | 1                            | 1                        |                                                | 3                                | 1          | 0.0                                     |
| 39       | 1                              | 0                   | 0              | 0                  | 0                  | 1             | 1                            | 1                        |                                                | 2                                | 0          | 7.0                                     |
| 40       | 1                              | 1                   | 0              | 0                  | 1                  | 0             | 0                            | 0                        |                                                | 2                                | 1          |                                         |
| 41       | 0                              | 1                   | 0              | 0                  | 1                  | 0             | 0                            | 0                        |                                                | 2                                | 1          |                                         |
| 42       | 0                              | 0                   | 0              | 0                  | 1                  | 0             | 0                            | 0                        |                                                | 1                                | 1          |                                         |
| 43       | 0                              | 1                   | 0              | 0                  | 0                  | 0             | 1 <sup>a</sup>               | 0                        |                                                | 1                                | 1          | 15.4 <sup>b</sup>                       |
| 44       | 0                              | 0                   | 1              | 0                  | 1                  | 0             | 0                            | 0                        |                                                | 2                                | 1          |                                         |
| 45       | 0                              | 1                   | 0              | 0                  | 0                  | 0             | 0                            | 0                        |                                                | 1                                | 0          |                                         |
| 46       | 0                              | 0                   | 1              | 1                  | 0                  | 0             | 0                            | 0                        | Brain                                          | 3                                | 1          |                                         |
| 47       | 0                              | 1                   | 1              | 0                  | 1                  | 1             | 1                            | 0                        |                                                | 4                                | 1          | 21.3                                    |
| 48       | 0                              | 1                   | 0              | 0                  | 1                  | 0             | 0                            | 0                        |                                                | 2                                | 1          |                                         |
| 49       | 0                              | 0                   | 0              | 0                  | 0                  | 0             | 0                            | 1                        |                                                | 1                                | 0          |                                         |
| 50       | 0                              | 1                   | 0              | 0                  | 0                  | 0             | 0                            | 0                        |                                                | 1                                | 1          |                                         |
| 51       | 0                              | 1                   | 0              | 0                  | 1                  | 1             | 1                            | 0                        |                                                | 3                                | 1          | 1.6                                     |
| 52       | 0                              | 0                   | 0              | 0                  | 0                  | 1             | 1                            | 1                        |                                                | 2                                | 0          | 0.0                                     |
| 53       | 0                              | 1                   | 1              | 0                  | 0                  | 0             | 0                            | 0                        |                                                | 2                                | 1          |                                         |
| 54       | 0                              | 1                   | 1              | 0                  | 0                  | 0             | 0                            | 0                        |                                                | 2                                | 1          |                                         |
| 55       | 0                              | 1                   | 0              | 0                  | 0                  | 0             | 0                            | 0                        |                                                | 1                                | 1          |                                         |
| 56       | 0                              | 0                   | 0              | 1                  | 0                  | 0             | 0                            | 0                        | Pleura                                         | 2                                | 0          |                                         |
| 57       | 0                              | 1                   | 0              | 0                  | 0                  | 0             | 0                            | 1                        |                                                | 2                                | 1          |                                         |

<sup>a</sup>Time to radiographic detection of ascites from diagnosis with metastatic colorectal cancer.

(continued on next page)

<sup>b</sup>Ascites detected only after extended follow-up (through 8/2016).

## eAppendix 3. Supplemental Methods (cont.)

| Study ID | BRF<br>0=wild-type<br>1=mutant | Liver<br>Metastases |   | Lung<br>Metastases | Bone<br>Metastases | Lymph<br>Node<br>Metastases |                              | Peritoneal<br>Metastases | Other<br>Metastatic<br>Sites | Number of<br>Metastatic<br>Sites | RECIST 1.1 | Time to<br>Ascites<br>(mo) <sup>a</sup> |
|----------|--------------------------------|---------------------|---|--------------------|--------------------|-----------------------------|------------------------------|--------------------------|------------------------------|----------------------------------|------------|-----------------------------------------|
|          |                                | 0=no;<br>1=yes      |   |                    |                    | Ascites                     | Measurable<br>0=no;<br>1=yes |                          |                              |                                  |            |                                         |
| 58       | 0                              | 1                   | 0 | 0                  | 0                  | 1                           | 0                            | 0                        |                              | 2                                | 1          |                                         |
| 59       | 0                              | 1                   | 1 | 0                  | 0                  | 1                           | 1                            | 0                        |                              | 4                                | 1          | 8.1                                     |
| 60       | 0                              | 0                   | 0 | 0                  | 0                  | 0                           | 0                            | 0                        |                              | 0                                | 0          |                                         |
| 61       | 0                              | 1                   | 1 | 0                  | 0                  | 1                           | 1                            | 1                        |                              | 5                                | 1          | 0.0                                     |
| 62       | 0                              | 1                   | 0 | 0                  | 0                  | 0                           | 0                            | 0                        |                              | 1                                | 1          |                                         |
| 63       | 0                              | 1                   | 0 | 0                  | 0                  | 0                           | 1 <sup>a</sup>               | 0                        |                              | 1                                | 1          | 40.5 <sup>b</sup>                       |
| 64       | 0                              | 1                   | 1 | 0                  | 0                  | 0                           | 0                            | 0                        | Brain                        | 3                                | 1          |                                         |
| 65       | 0                              | 1                   | 1 | 0                  | 0                  | 0                           | 1 <sup>a</sup>               | 0                        |                              | 2                                | 1          | 26.8 <sup>b</sup>                       |
| 66       | 0                              | 1                   | 1 | 1                  | 1                  | 1                           | 0                            | 0                        |                              | 4                                | 1          |                                         |
| 67       | 0                              | 1                   | 0 | 0                  | 0                  | 1                           | 0                            | 0                        |                              | 2                                | 1          |                                         |
| 68       | 0                              | 1                   | 0 | 0                  | 0                  | 0                           | 0                            | 1                        |                              | 2                                | 1          |                                         |
| 69       | 0                              | 1                   | 1 | 1                  | 1                  | 1                           | 0                            | 0                        |                              | 4                                | 1          |                                         |
| 70       | 0                              | 1                   | 0 | 0                  | 0                  | 1                           | 0                            | 0                        |                              | 2                                | 1          |                                         |
| 71       | 0                              | 0                   | 0 | 0                  | 0                  | 0                           | 1                            | 1                        |                              | 2                                | 0          | 23.2                                    |
| 72       | 0                              | 0                   | 0 | 0                  | 0                  | 1                           | 0                            | 1                        |                              | 2                                | 0          |                                         |
| 73       | 0                              | 0                   | 1 | 0                  | 0                  | 0                           | 0                            | 0                        |                              | 1                                | 1          |                                         |
| 74       | 0                              | 0                   | 1 | 1                  | 1                  | 1                           | 0                            | 0                        |                              | 3                                | 1          |                                         |
| 75       | 0                              | 1                   | 0 | 0                  | 0                  | 1                           | 0                            | 1                        |                              | 3                                | 1          |                                         |
| 76       | 0                              | 0                   | 1 | 0                  | 0                  | 1                           | 0                            | 0                        |                              | 2                                | 1          |                                         |
| 77       | 0                              | 0                   | 1 | 0                  | 0                  | 1                           | 1                            | 0                        |                              | 3                                | 1          | 28.1                                    |
| 78       | 0                              | 1                   | 1 | 0                  | 0                  | 1                           | 0                            | 0                        |                              | 3                                | 1          |                                         |
| 79       | 0                              | 1                   | 0 | 0                  | 0                  | 1                           | 0                            | 0                        |                              | 2                                | 1          |                                         |
| 80       | 0                              | 1                   | 0 | 0                  | 0                  | 1                           | 0                            | 0                        |                              | 2                                | 1          |                                         |
| 81       | 0                              | 1                   | 0 | 0                  | 0                  | 1                           | 0                            | 0                        |                              | 2                                | 1          |                                         |
| 82       | 0                              | 1                   | 1 | 0                  | 0                  | 1                           | 0                            | 0                        |                              | 3                                | 1          |                                         |
| 83       | 0                              | 0                   | 0 | 0                  | 0                  | 0                           | 1                            | 1                        |                              | 2                                | 0          | 2.2                                     |
| 84       | 0                              | 1                   | 1 | 0                  | 0                  | 0                           | 1                            | 1                        | Pleura                       | 5                                | 1          | 0.2                                     |
| 85       | 0                              | 1                   | 1 | 0                  | 0                  | 0                           | 0                            | 0                        |                              | 2                                | 1          |                                         |
| 86       | 0                              | 1                   | 0 | 0                  | 0                  | 0                           | 0                            | 0                        |                              | 1                                | 1          |                                         |
| 87       | 0                              | 1                   | 0 | 0                  | 0                  | 1                           | 0                            | 0                        |                              | 2                                | 1          |                                         |
| 88       | 0                              | 1                   | 1 | 0                  | 0                  | 1                           | 0                            | 0                        |                              | 3                                | 1          |                                         |
| 89       | 0                              | 1                   | 1 | 0                  | 0                  | 0                           | 1                            | 1                        |                              | 4                                | 1          | 0.0                                     |
| 90       | 0                              | 0                   | 1 | 0                  | 0                  | 0                           | 0                            | 0                        |                              | 1                                | 1          |                                         |
| 91       | 0                              | 1                   | 0 | 0                  | 0                  | 1                           | 0                            | 1                        |                              | 3                                | 1          |                                         |
| 92       | 0                              | 1                   | 0 | 0                  | 0                  | 0                           | 0                            | 0                        |                              | 1                                | 1          |                                         |
| 93       | 0                              | 0                   | 1 | 0                  | 0                  | 1                           | 1                            | 1                        |                              | 4                                | 1          | 32.3                                    |
| 94       | 0                              | 1                   | 0 | 0                  | 0                  | 0                           | 0                            | 0                        |                              | 1                                | 1          |                                         |
| 95       | 0                              | 0                   | 0 | 0                  | 0                  | 0                           | 0                            | 1                        |                              | 1                                | 0          |                                         |
| 96       | 0                              | 1                   | 0 | 0                  | 0                  | 0                           | 0                            | 1                        |                              | 2                                | 1          |                                         |
| 97       | 0                              | 1                   | 0 | 0                  | 0                  | 1                           | 0                            | 1                        | Ovary                        | 4                                | 1          |                                         |
| 98       | 0                              | 1                   | 0 | 0                  | 0                  | 1                           | 0                            | 0                        |                              | 2                                | 1          |                                         |
| 99       | 0                              | 1                   | 0 | 1                  | 1                  | 1                           | 1                            | 0                        |                              | 4                                | 1          | 0.0                                     |
| 100      | 0                              | 1                   | 1 | 0                  | 0                  | 0                           | 0                            | 0                        |                              | 2                                | 1          |                                         |
| 101      | 0                              | 0                   | 1 | 0                  | 0                  | 0                           | 0                            | 0                        |                              | 1                                | 1          |                                         |
| 102      | 0                              | 1                   | 1 | 0                  | 0                  | 1                           | 0                            | 0                        | Spleen                       | 4                                | 1          |                                         |
| 103      | 0                              | 0                   | 0 | 0                  | 0                  | 1                           | 0                            | 1                        |                              | 2                                | 1          |                                         |
| 104      | 0                              | 1                   | 1 | 0                  | 0                  | 0                           | 0                            | 0                        |                              | 2                                | 1          |                                         |
| 105      | 0                              | 1                   | 1 | 0                  | 0                  | 1                           | 1                            | 0                        |                              | 4                                | 1          | 12.8                                    |
| 106      | 0                              | 1                   | 1 | 0                  | 0                  | 0                           | 1                            | 1                        |                              | 4                                | 1          | 16.2                                    |
| 107      | 0                              | 1                   | 0 | 0                  | 0                  | 0                           | 0                            | 0                        |                              | 1                                | 1          |                                         |
| 108      | 0                              | 1                   | 0 | 0                  | 0                  | 1                           | 1                            | 1                        |                              | 4                                | 1          | 0.1                                     |
| 109      | 0                              | 0                   | 0 | 0                  | 0                  | 1                           | 0                            | 0                        |                              | 1                                | 1          |                                         |
| 110      | 0                              | 0                   | 1 | 0                  | 0                  | 1                           | 0                            | 0                        |                              | 2                                | 0          |                                         |
| 111      | 0                              | 0                   | 0 | 0                  | 0                  | 0                           | 1                            | 1                        |                              | 2                                | 0          | 0.0                                     |
| 112      | 0                              | 0                   | 1 | 0                  | 0                  | 0                           | 0                            | 0                        |                              | 1                                | 1          |                                         |
| 113      | 0                              | 1                   | 0 | 0                  | 0                  | 0                           | 0                            | 0                        |                              | 1                                | 1          |                                         |
| 114      | 0                              | 0                   | 0 | 0                  | 0                  | 0                           | 1                            | 1                        |                              | 2                                | 0          | 0.0                                     |
| 115      | 0                              | 1                   | 1 | 0                  | 0                  | 0                           | 0                            | 0                        | Brain                        | 3                                | 1          |                                         |
| 116      | 0                              | 0                   | 0 | 0                  | 0                  | 0                           | 1                            | 1                        |                              | 2                                | 0          | 0.0                                     |
| 117      | 0                              | 1                   | 1 | 0                  | 0                  | 1                           | 1                            | 1                        |                              | 5                                | 1          | 1.8                                     |
| 118      | 0                              | 1                   | 0 | 1                  | 0                  | 0                           | 0                            | 1                        |                              | 3                                | 1          |                                         |
| 119      | 0                              | 0                   | 0 | 0                  | 0                  | 0                           | 0                            | 0                        |                              | 0                                | 0          |                                         |
| 120      | 0                              | 1                   | 0 | 0                  | 0                  | 0                           | 0                            | 1                        |                              | 2                                | 1          |                                         |

<sup>a</sup>Time to radiographic detection of ascites from diagnosis with metastatic colorectal cancer.

<sup>b</sup>Ascites detected only after extended follow-up (through 8/2016).

| eAppendix 4. Patterns of Metastasis by MSI Status |                            |                            |         |
|---------------------------------------------------|----------------------------|----------------------------|---------|
| Metastatic Sites                                  | MSI <sup>a</sup><br>(N=10) | MSS <sup>a</sup><br>(N=68) | P Value |
| Liver                                             | 4 (40%)                    | 44 (65%)                   | .13     |
| Lung                                              | 0 (0%)                     | 26 (38%)                   | .017    |
| Bone                                              | 0 (0%)                     | 5 (7%)                     | .37     |
| Lymph node                                        | 8 (80%)                    | 31 (46%)                   | .042    |
| Peritoneal                                        | 2 (20%)                    | 23 (34%)                   | .38     |
| Ascites                                           | 3 (30%)                    | 19 (28%)                   | .89     |

Abbreviations: MSI, microsatellite instability (or mismatch repair deficient); MSS, microsatellite stability (or mismatch repair proficient).

<sup>a</sup>The MSI/MMR status of 42 patients was unknown.

| eAppendix 5. Patterns of Metastasis by <i>BRAF</i> Mutation Status and Location of Colorectal Cancer Primary With Omission of Transverse Colon Primaries |               |                  |         |                       |                  |         |                      |                  |         |
|----------------------------------------------------------------------------------------------------------------------------------------------------------|---------------|------------------|---------|-----------------------|------------------|---------|----------------------|------------------|---------|
| Metastatic Sites                                                                                                                                         | Entire Cohort |                  |         | Right Colon Primaries |                  |         | Left Colon Primaries |                  |         |
|                                                                                                                                                          | Mutant (N=34) | Wild-Type (N=77) | P Value | Mutant (N=23)         | Wild-Type (N=45) | P Value | Mutant (N=7)         | Wild-Type (N=24) | P Value |
| Liver                                                                                                                                                    | 19 (56%)      | 53 (69%)         | .19     | 14 (61%)              | 30 (67%)         | .64     | 3 (43%)              | 19 (79%)         | .063    |
| Lung                                                                                                                                                     | 10 (29%)      | 32 (42%)         | .22     | 7 (30%)               | 15 (33%)         | .81     | 2 (29%)              | 11 (46%)         | .41     |
| Bone                                                                                                                                                     | 4 (10%)       | 7 (9%)           | .66     | 3 (13%)               | 2 (4%)           | .20     | 1 (14%)              | 4 (17%)          | .88     |
| Lymph node                                                                                                                                               | 19 (56%)      | 35 (45%)         | .31     | 12 (52%)              | 21 (47%)         | .67     | 6 (86%)              | 12 (50%)         | .092    |
| Peritoneal                                                                                                                                               | 20 (50%)      | 22 (29%)         | .029    | 13 (56%)              | 17 (38%)         | .14     | 3 (43%)              | 4 (17%)          | .14     |
| Ascites                                                                                                                                                  | 16 (47%)      | 17 (22%)         | .0079   | 10 (43%)              | 14 (31%)         | .31     | 4 (57%)              | 3 (12%)          | .013    |

Six patients with *BRAF*-mutated transverse colon primaries (1 classified as originating in the right colon, 5 classified as originating in the left colon) and 3 patients with *BRAF* wild-type transverse colon primaries (all classified as originating in the right colon) were excluded from this analysis.



| eAppendix 6. Univariate and Multivariate Predictors of Survival in <i>BRAF</i> -Mutant Metastatic Colorectal Cancer |               |      |          |          |            |
|---------------------------------------------------------------------------------------------------------------------|---------------|------|----------|----------|------------|
| N                                                                                                                   | Survival (mo) | HR   | CI Lower | CI Upper | LR P Value |
| <b>Primary location (left or right colon)</b>                                                                       |               |      |          |          |            |
| L: 12                                                                                                               | 18.3          | 0.47 | 0.21     | 1.04     | .07        |
| R: 24                                                                                                               | 25.0          |      |          |          |            |
| <b>Sex</b>                                                                                                          |               |      |          |          |            |
| M: 16                                                                                                               | 15.6          | 0.37 | 0.18     | 0.76     | .009       |
| F: 24                                                                                                               | 27.4          |      |          |          |            |
| <b>Stage at diagnosis</b>                                                                                           |               |      |          |          |            |
| II/III: 13                                                                                                          | 22.6          | 0.87 | 0.41     | 1.83     | .71        |
| IV: 27                                                                                                              | 23.7          |      |          |          |            |
| <b>Grade (low or high)</b>                                                                                          |               |      |          |          |            |
| Low: 23                                                                                                             | 23.7          | 1.01 | 0.44     | 2.27     | .99        |
| High: 11                                                                                                            | 24.5          |      |          |          |            |
| <b>Age category, y</b>                                                                                              |               |      |          |          |            |
| <50: 9                                                                                                              | 31.4          | 1.56 | 0.63     | 3.86     | .31        |
| ≥50: 31                                                                                                             | 22.6          |      |          |          |            |
| <b>Primary resected</b>                                                                                             |               |      |          |          |            |
| (-): 10                                                                                                             | 14.9          | 0.30 | 0.13     | 0.70     | .009       |
| (+): 30                                                                                                             | 25.0          |      |          |          |            |
| <b>Metastasis resected</b>                                                                                          |               |      |          |          |            |
| (-): 33                                                                                                             | 22.5          | 0.61 | 0.23     | 1.60     | .29        |
| (+): 7                                                                                                              | 25.7          |      |          |          |            |
| <b>Metastatic sites</b>                                                                                             |               |      |          |          |            |
| <b>Liver</b>                                                                                                        |               |      |          |          |            |
| (-): 19                                                                                                             | 24.5          | 1.42 | 0.70     | 2.88     | .33        |
| (+): 21                                                                                                             | 22.5          |      |          |          |            |
| <b>Lung</b>                                                                                                         |               |      |          |          |            |
| (-): 28                                                                                                             | 23.7          | 0.54 | 0.24     | 1.24     | .13        |
| (+): 12                                                                                                             | 22.6          |      |          |          |            |
| <b>Lymph node</b>                                                                                                   |               |      |          |          |            |
| (-): 18                                                                                                             | 24.5          | 1.02 | 0.50     | 2.10     | .95        |
| (+): 21                                                                                                             | 23.7          |      |          |          |            |
| <b>Peritoneum</b>                                                                                                   |               |      |          |          |            |
| (-): 20                                                                                                             | 21.8          | 0.62 | 0.31     | 1.27     | .20        |
| (+): 20                                                                                                             | 25.0          |      |          |          |            |
| <b>Ascites</b>                                                                                                      |               |      |          |          |            |
| (-): 20                                                                                                             | 29.6          | 2.35 | 1.14     | 4.83     | .02        |
| (+): 20                                                                                                             | 20.7          |      |          |          |            |
| <b>RECIST measureable</b>                                                                                           |               |      |          |          |            |
| (P): 8                                                                                                              | 24.5          | 0.93 | 0.34     | 2.53     | --         |
| (+): 32                                                                                                             | 21.8          |      |          |          |            |
| <b>Trial participant</b>                                                                                            |               |      |          |          |            |
| (P): 16                                                                                                             | 18.3          | 0.50 | 0.23     | 1.05     | --         |
| (+): 24                                                                                                             | 27.4          |      |          |          |            |
| <b>Adjusted for Ascites</b>                                                                                         |               |      |          |          |            |
| Sex, peritoneal metastasis, location, age, stage, grade, resection, metastasectomy*                                 | 6.15          | 1.74 | 21.79    |          | .0007      |
| Sex, peritoneal metastasis, location, age, stage, grade, resection                                                  | 5.85          | 1.76 | 19.40    |          | .0003      |
| Sex, peritoneal metastasis, location, age, stage, grade                                                             | 7.06          | 2.21 | 22.54    |          | .0003      |
| Sex, peritoneal metastasis, location, age, stage                                                                    | 7.53          | 2.54 | 22.32    |          | .0001      |
| Sex, peritoneal metastasis, location, age                                                                           | 6.81          | 2.41 | 19.22    |          | <.0001     |
| Sex, peritoneal metastasis, location                                                                                | 5.85          | 2.16 | 15.87    |          | .0001      |
| Sex, peritoneal metastasis                                                                                          | 3.59          | 1.63 | 7.92     |          | .0001      |
| Sex                                                                                                                 | 2.51          | 1.19 | 5.28     |          | .0017      |

Abbreviations: F, female; HR, hazard ratio; L, left; LR, likelihood ratio; M, male; R, right.

\*Adjustment for sex, peritoneal metastases, location of primary tumor (left or right colon), age and stage at diagnosis, tumor grade, resection of primary tumor, and metastases. Based on diagnostic plots (not shown) and the Schoenfeld test ( $P=.68$ ), the assumption of proportional hazards for primary tumor location effect is reasonable in this dataset.

| eAppendix 7. Timing of Radiographic Detection of Ascites |                            |                          |
|----------------------------------------------------------|----------------------------|--------------------------|
| Time of Ascites Detection                                | <i>BRAF</i> -mut<br>(N=20) | <i>BRAF</i> wt<br>(N=22) |
| Median time after mCRC diagnosis (range), mo             | 7 (0–30)                   | 2 (0–40)                 |
| Within 3 mo of mCRC diagnosis                            | 8 (40%)                    | 12 (54%)                 |
| Within 3 mo of death from mCRC                           | 7 (20%)                    | 7 (32%)                  |

Abbreviations: mCRC, metastatic colorectal cancer; mut, mutant; wt, wild-type.
